# Supplementary material for: Surface-controlled preparation of EuWO4(OH) nanobelts and their hybrid with Au nanoparticles as a novel enzyme-free sensing platform towards hydrogen peroxide
Source: Royal Society of Chemistry journal article supplement (doi:10.1039/c7cc00734e), 2017-01-01
Supplement: c7cc00734e1.pdf [file c7cc00734e1.pdf]

## Electronic supplementary information

### Surface-controlled preparation of $\text{EuWO}_4(\text{OH})$ nanobelts and their hybrid with Au nanoparticles as a novel enzyme-free sensing platform towards hydrogen peroxide

Linglin Yu<sup>a‡</sup>, Yao Wang<sup>a‡</sup>, Qiong Wu<sup>a‡</sup>, Ze Yuan<sup>a</sup>, Xiaoji Xie<sup>a</sup>, Zhiwei Wang<sup>a</sup>, Ning Wang<sup>a\*</sup>, Xiao Huang<sup>a\*</sup>, Wei Huang<sup>a\*</sup>

*a. Key Laboratory of Flexible Electronics (KLOFE) & Institute of Advanced Materials (IAM), Jiangsu National Synergistic Innovation Center for Advanced Materials (SICAM), Nanjing Tech University (Nanjing Tech), 30 South Puzhu Road, Nanjing 211816, P.R. China.*

Email: [iamxhuang@njtech.edu.cn](mailto:iamxhuang@njtech.edu.cn), [iamnwang@njtech.edu.cn](mailto:iamnwang@njtech.edu.cn), [wei-huang@njtech.edu.cn](mailto:wei-huang@njtech.edu.cn)

#### 1. Methods

##### 1.1. Chemicals.

Ammonium metatungstate hydrate ( $(\text{NH}_4)_{10}\text{H}_2(\text{W}_2\text{O}_7)_6 \cdot x\text{H}_2\text{O}$ , 99.99%), thiourea ( $\text{CS}(\text{NH}_2)_2$ ,  $\geq 99.0\%$ ), sodium molybdate dihydrate ( $\text{Na}_2\text{MoO}_4 \cdot 2\text{H}_2\text{O}$ ,  $\geq 99.0\%$ ), thioacetamide ( $\text{CH}_3\text{CSNH}_2$ ,  $\geq 99.0\%$ ), europium (III) nitrate hexahydrate ( $\text{Eu}(\text{NO}_3)_3 \cdot 6\text{H}_2\text{O}$ , 99%), sodium citrate tribasic dehydrate ( $\text{HOC}(\text{COONa})(\text{CH}_2\text{COONa})_2 \cdot 2\text{H}_2\text{O}$ ,  $\geq 99.0\%$ ), gold (III) chloride hydrate ( $\text{HAuCl}_4 \cdot x\text{H}_2\text{O}$ , 99.999%) were purchased from Sigma-Aldrich (Steinheim, Germany).  $\text{H}_2\text{O}_2$  (30%) was purchased from Sinopharm Chemical Reagent Co., Ltd (Shanghai, China).  $\text{Na}_2\text{HPO}_4 \cdot 12\text{H}_2\text{O}$  ( $\geq 99.0\%$ ),  $\text{KH}_2\text{PO}_4$  ( $\geq 99.5\%$ ),  $\text{Na}_2\text{CO}_3$  ( $\geq 99.8\%$ ),  $\text{NaHCO}_3$  ( $\geq 99.5\%$ ),  $\text{NaClO}$  ( $\geq 5.2\%$ ) and  $\text{HCl}$  (36%) were purchased from Shanghai Linfeng Chemical Reagent Co., Ltd (Shanghai, China). Methylene blue (MB, 98.5%) was purchased from Tianjin Chemical Reagent Research Institute Co., Ltd (Tianjin, China).  $\text{NaNO}_2$  (99.0%) and  $\text{KNO}_3$  (99.0%) were purchased from Xilong Scientific Co., Ltd (Shantou, China). All reagents

were used as received without further purification. The deionized water was purified using a Milli-Q3 System (Millipore, France).

### *1.2. Synthesis of $\text{EuWO}_4(\text{OH})$ nanobelts.*

In a typical process, 42 mg of  $(\text{NH}_4)_{10}\text{H}_2(\text{W}_2\text{O}_7)_6 \cdot x\text{H}_2\text{O}$ , 128 mg of  $\text{CS}(\text{NH}_2)_2$  and 20 mg of  $\text{Eu}(\text{NO}_3)_3 \cdot 6\text{H}_2\text{O}$  were dissolved in 19.5 mL distilled water in a 25 mL Teflon-lined stainless-steel autoclave. The autoclave was sealed and heated to 220 °C at 5 °C min<sup>-1</sup> and maintained at this temperature for 24 h before cooled naturally to room temperature. The product was collected by centrifugation and washed with absolute ethanol and distilled water in turn before further characterizations.

### *1.3 Preparation of $\text{EuWO}_4(\text{OH})$ -Au hybrids.*

0.04 mg of the  $\text{EuWO}_4(\text{OH})$  nanobelt power was mixed with 9 mL aqueous solution containing 0.3 mM sodium citrate and 0.1 mM  $\text{HAuCl}_4$  in a 10 mL glass bottle. Thereafter, the solution was irradiated with a 150 W halogen lamp at 70 % of its full intensity, during which the glass bottle was placed horizontally and kept 0.5 cm away from the light source. After 4 h of irradiation, the solution became red, indicating the formation of Au nanoparticles. The obtained product was then washed with water before further characterizations.

### *1.4 Characterizations.*

The morphological, structural and compositional characterizations of the products were investigated by scanning electron microscopy (SEM, Hitachi S-4800, Japan), high resolution transmission electron microscope (HRTEM, JEOL 2100F, Japan) coupled with energy dispersive X-ray (EDX) spectroscopy, X-ray diffraction (XRD, SmartLab Rigaku, Japan), and X-ray photoelectron spectroscopy (XPS, PHI 5000 VersaProbe, Japan). The XRD characterization was carried on a diffractometer equipped with  $\text{Cu K}_\alpha$  radiation ( $\lambda = 1.54 \text{ \AA}$ ). For the XPS measurements, the binding energies were corrected for specimen

charging effects using the C 1s level at 284.6 eV as the reference. Excitation and emission spectra of the rare-earth compounds were measured under UV excitation at 250 nm on a fluorescent spectrometer (HitachiF-4600 FL) equipped with a power adjustable diode laser. The maximum photoluminescence of  $\text{Eu}^{3+}$  was recorded at 614 nm. Luminescence decay plots were obtained with a HORIBA Fluorolog-3 spectrofluorimeter under excitation at 250 nm. The pH values of buffer solutions were determined by a pH meter (Mettler Toledo Seven Excellent).

#### *1.5 Investigation on the pH-dependent luminescence of $\text{EuWO}_4(\text{OH})$ .*

Buffer solutions were pre-prepared by mixing  $\text{Na}_2\text{HPO}_4 \cdot 12\text{H}_2\text{O}$  and  $\text{KH}_2\text{PO}_4$  (or  $\text{Na}_2\text{CO}_3$  and  $\text{NaHCO}_3$ ) at certain concentrations, and then their pH values were determined by a pH meter to be 6.0, 7.0, 8.0, 9.2, 10.1 and 10.8, respectively. To 2 mL of each of the above buffer solutions, 30  $\mu\text{L}$  of  $\text{EuWO}_4(\text{OH})$  nanobelt dispersion in water ( $0.6 \text{ mg mL}^{-1}$ ) were added and incubated for 10 min at room temperature before their luminescent spectra were collected. All experiments were repeated three times, and the data were averaged.

#### *1.6 Luminescent sensing of $\text{H}_2\text{O}_2$ .*

In a typical process, 2 mL of  $\text{EuWO}_4(\text{OH})\text{-Au}$  ( $0.009 \text{ mg mL}^{-1}$ ) aqueous solution was mixed with 1  $\mu\text{L}$   $\text{H}_2\text{O}_2$  aqueous solution with varied concentrations to give a final concentration of 0.1 to 3.0  $\mu\text{M}$  in a quartz cuvette, followed by 8 min of incubation. After that, the emission intensity at 614 nm was recorded under 250 nm excitation. All experiments were repeated three times, and the data were averaged.

#### *1.7 Production of various reactive oxygen species (ROS)*

The various ROS were prepared based on previous report.<sup>1</sup> Nitrite ( $\text{NO}_2^-$ ) was prepared from  $\text{NaNO}_2$ . Hypochlorite ( $\text{OCl}^-$ ) was prepared from  $\text{NaClO}$  aqueous solution. Nitrate ( $\text{NO}_3^-$ ) was prepared from an aqueous solution of  $\text{NaNO}_3$ . Peroxynitrite ( $\text{ONOO}^-$ ) was prepared by mixing 0.6 M of  $\text{NaNO}_2$  aqueous solution with 0.7 M  $\text{H}_2\text{O}_2$  with the same

volume containing 0.6 M HCl.

*1.8 Detection of hydroxyl radicals by using methylene blue (MB) as an indicator.*

90  $\mu\text{L}$  of sodium citrate aqueous solution (30 mM) and 30  $\mu\text{L}$  of  $\text{HAuCl}_4$  aqueous solution (30 mM) were mixed with 9 mL distilled water in a 10 mL glass bottle. Thereafter, the solution was irradiated with a 150 W halogen lamp at 70 % of its full intensity, during which the glass bottle was placed horizontally and kept 0.5 cm away from the light source. After 4 h of irradiation, the solution became red, indicating the formation of Au NPs. The obtained product was washed with water and then re-dispersed in 2 mL water. 30  $\mu\text{L}$  of this Au NP solution was mixed with 2 mL of MB (1.5  $\mu\text{M}$ ) aqueous solution in a quartz cuvette, into which 1  $\mu\text{L}$   $\text{H}_2\text{O}_2$  aqueous solution (2 mM) was added to give a final concentration of 1.0  $\mu\text{M}$ . UV-vis adsorption spectra of the solution were collected before and after  $\text{H}_2\text{O}_2$  was added.

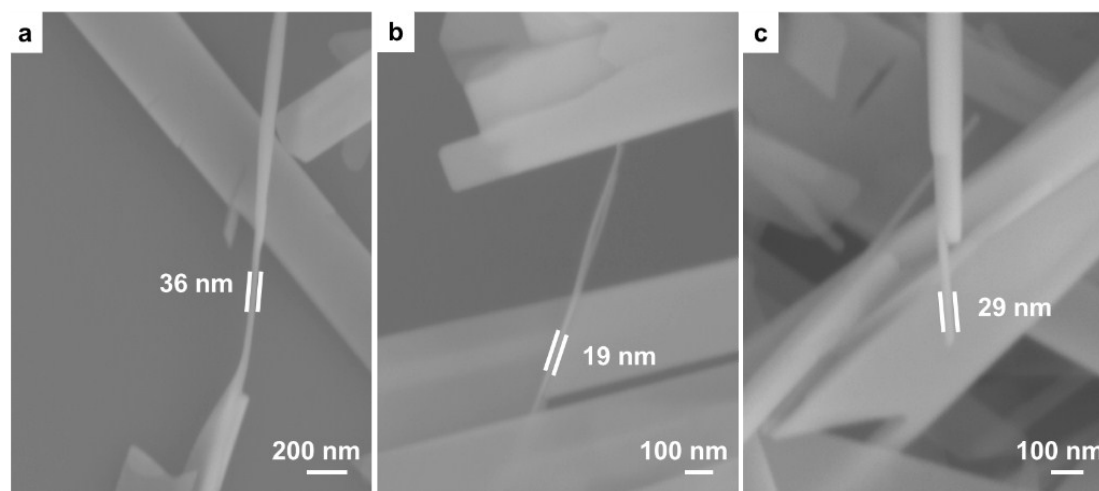

**Fig. S1** Side-view SEM images of typical  $\text{EuWO}_4(\text{OH})$  nanobelts, revealing an average thickness of  $\sim 30$  nm.

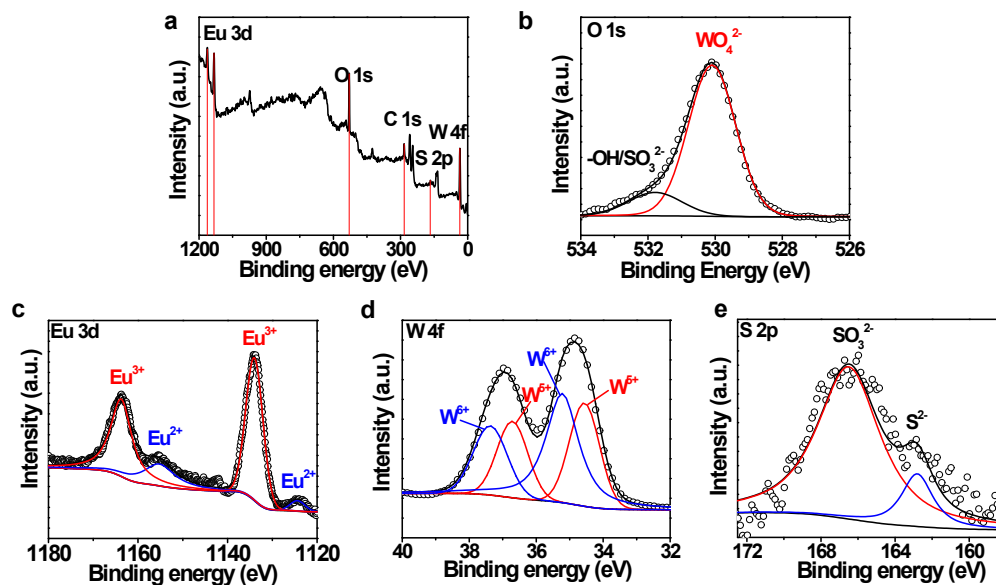

**Fig. S2** XPS analysis of  $\text{EuWO}_4(\text{OH})$  nanobelts. (a) Full scan, (b) O 1s, (c) Eu 3d, (d) W 4f and (e) S 2p spectra of the  $\text{EuWO}_4(\text{OH})$  nanobelts deposited on  $\text{Si}/\text{SiO}_x$ .

As shown in **Fig. S2a**, Eu, W, S and O elements can be detected in the full scan spectrum. The high resolution O 1s spectrum in **Fig. S2b** can be deconvoluted to give two sets of doublet peaks, attributable to  $\text{WO}_4^{2-}$  (530.08 eV) and  $-\text{OH}/\text{SO}_3^{2-}$  (531.78 eV) species, respectively.<sup>2</sup> In the high resolution Eu 3d spectrum (**Fig. S2c**), two sets of doublet peaks can be assigned to  $\text{Eu}^{3+}$  (1134.00 and 1163.76 eV) and  $\text{Eu}^{2+}$  (1124.37 and 1155.20 eV) states, respectively.<sup>3</sup> The high resolution W 4f spectrum (**Fig. S2d**) reveals two sets of doublet peaks for  $\text{W}^{5+}$  (34.56 and 36.71 eV) and  $\text{W}^{6+}$  (35.22 and 37.37 eV),<sup>4</sup> respectively. The high resolution S 2p spectrum (**Fig. S2e**) shows two peaks at 166.7 and 162.8 eV, assignable to  $\text{SO}_3^{2-}$  and  $\text{S}^{2-}$ , respectively.<sup>2, 5</sup>

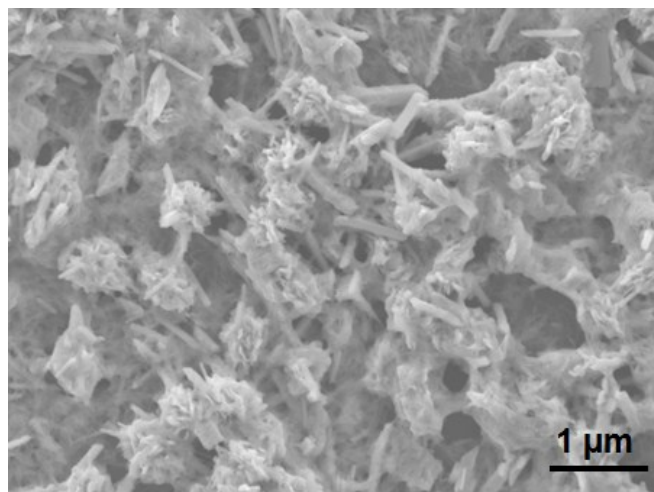

**Fig. S3** SEM image of  $\text{EuWO}_4(\text{OH})$  rods and irregular flower-like assemblies prepared without adding  $\text{CS}(\text{NH}_2)_2$  to the synthetic solution.

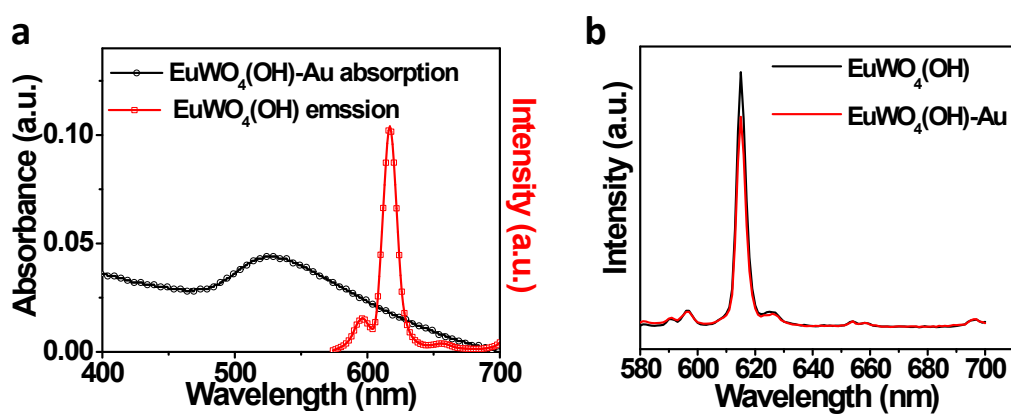

**Fig. S4** (a) UV-vis absorption and luminescent emission spectra of  $\text{EuWO}_4(\text{OH})\text{-Au}$  hybrid. The excitation wavelength is 250 nm. (b) Emission spectra of  $\text{EuWO}_4(\text{OH})$  nanobelts and  $\text{EuWO}_4(\text{OH})\text{-Au}$  hybrid upon excitation at 250 nm.

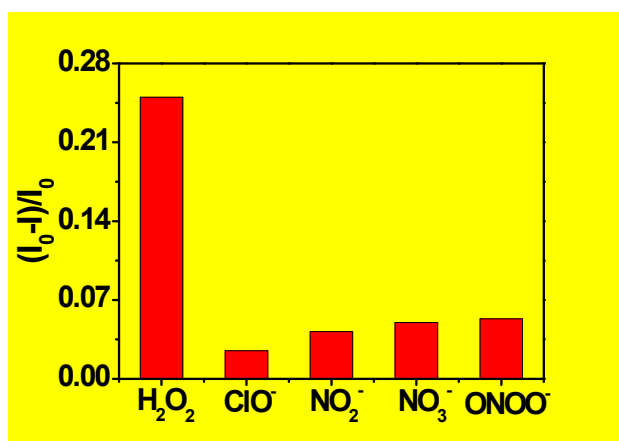

**Fig. S5** Normalized change of luminescent intensity ( $(I_0-I)/I_0$ ) of  $\text{EuWO}_4(\text{OH})\text{-Au}$  hybrid at 614 nm in response to  $1\ \mu\text{M}$   $\text{H}_2\text{O}_2$ ,  $\text{ClO}^-$ ,  $\text{NO}_2^-$ ,  $\text{NO}_3^-$  and  $\text{ONOO}^-$  under the excitation at 250 nm.

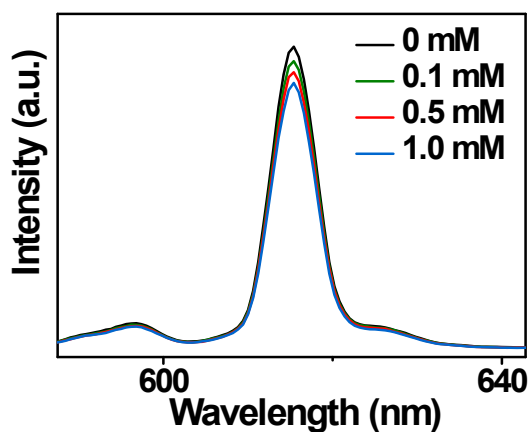

**Fig. S6** Emission spectra of  $\text{EuWO}_4(\text{OH})$  nanobelts in response to  $\text{H}_2\text{O}_2$  with concentrations varying from 0.1 to 1.0 mM.

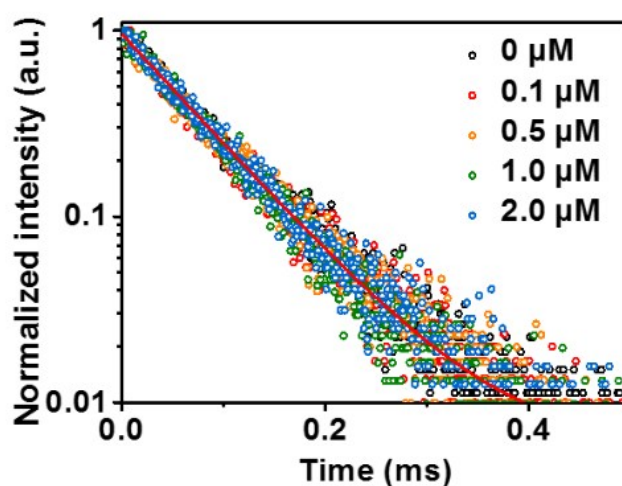

**Fig. S7** Luminescence decay of the  ${}^5\text{D}_0 \rightarrow {}^7\text{F}_2$  transition of  $\text{Eu}^{3+}$  of  $\text{EuWO}_4(\text{OH})\text{-Au}$  hybrid under the excitation at 250 nm in presence of  $\text{H}_2\text{O}_2$  with different concentrations. Each set of the spots was fitted by a single exponential function.

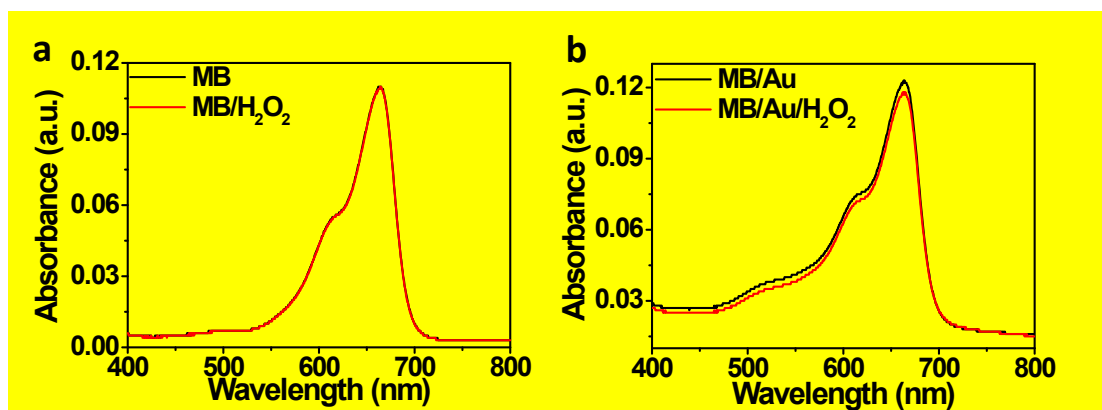

**Fig. S8** (a) UV-vis absorption spectra of an MB (1.5  $\mu\text{M}$ ) solution before (black) and after (red) the addition of  $\text{H}_2\text{O}_2$  (with a final concentration 1.0  $\mu\text{M}$ ). (b) UV-vis absorption spectra of a solution containing Au NPs and MB (1.5  $\mu\text{M}$ ) before (black) and after (red) the addition of  $\text{H}_2\text{O}_2$  (with a final concentration of 1.0  $\mu\text{M}$ ).

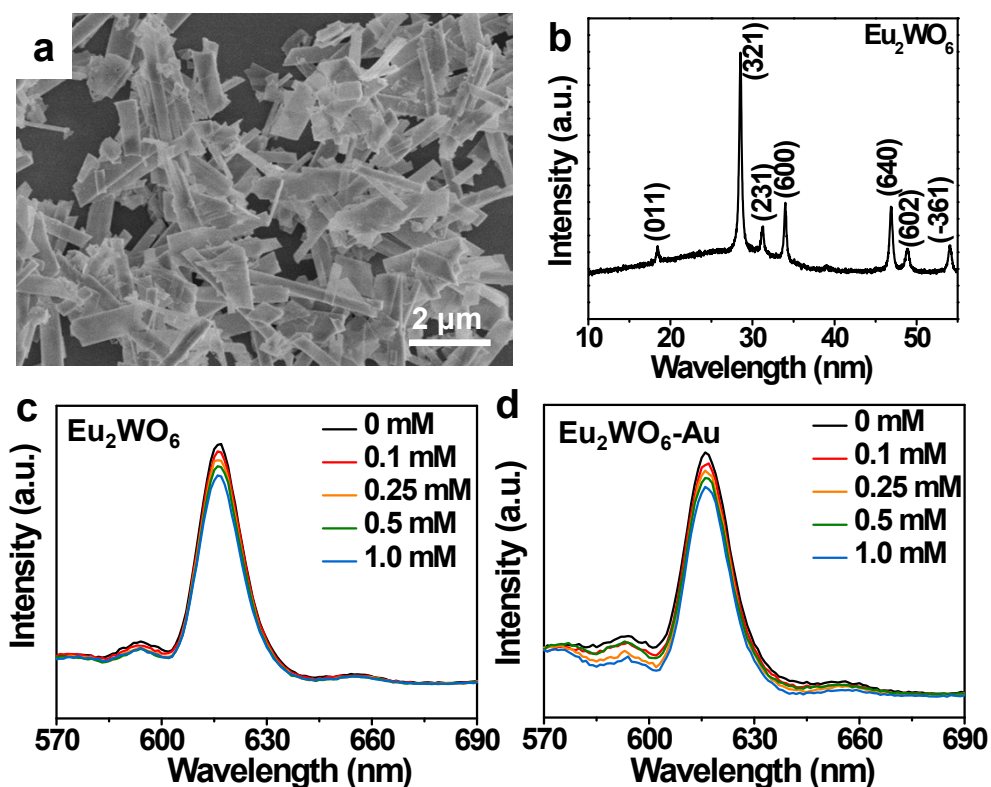

**Fig. S9** (a) SEM image and (b) XRD pattern of  $\text{Eu}_2\text{WO}_6$  nanoplates obtained by heating  $\text{EuWO}_4(\text{OH})$  nanobelts in  $\text{N}_2$  at 650  $^\circ\text{C}$  for 2 h. PL spectra of (c)  $\text{Eu}_2\text{WO}_6$  and (d)  $\text{Eu}_2\text{WO}_6\text{-Au}$  hybrid in presence of  $\text{H}_2\text{O}_2$  with varying concentrations from 0-1.0 mM.



**Table S1.** Performance of various luminescent H<sub>2</sub>O<sub>2</sub> sensors based on inorganic rare-earth nanocrystals.

| Material                                                                          | Linear range (M)                           | Limit of detection (nM) | Ref. |
|-----------------------------------------------------------------------------------|--------------------------------------------|-------------------------|------|
| Eu(III)-doped GdVO <sub>4</sub> nanoparticles                                     | $5 \times 10^{-6}$ to $2.5 \times 10^{-4}$ | 1600                    | 6    |
| Y <sub>0.6</sub> Eu <sub>0.4</sub> VO <sub>4</sub> nanoparticles                  | $1 \times 10^{-6}$ to $4.5 \times 10^{-5}$ | /                       | 7    |
| YAG:Ce (4%) and Gd <sub>0.6</sub> Eu <sub>0.4</sub> VO <sub>4</sub> nanoparticles | $5 \times 10^{-7}$ to $1 \times 10^{-5}$   | 500                     | 8    |
| (Y,Eu)PO <sub>4</sub> -(Y,Eu)VO <sub>4</sub> particles                            | $1 \times 10^{-2}$ to $4 \times 10^{-1}$   | /                       | 9    |
| EuVO <sub>4</sub> nanoparticles                                                   | 0-0.25 ppm                                 | 0.05 ppm                | 10   |
| EuVO <sub>4</sub> -based films                                                    | /                                          | 100 ppb                 | 11   |
| NaYF <sub>4</sub> :Yb/Er upconversion nanoparticles                               | $1 \times 10^{-7}$ to $4 \times 10^{-6}$   | 45                      | 12   |
| (MnO <sub>2</sub> )-nanosheet-modified upconversion nanoparticles                 | $1 \times 10^{-5}$ to $3.5 \times 10^{-4}$ | 900                     | 13   |
| CeO <sub>2</sub> nanoparticle                                                     | 0 to $1 \times 10^{-3}$                    | 130                     | 14   |

- 1 (a) M. H. Lan, Y. F. Di, X. Y. Zhu, T.-W. Ng, J. Xia, W. M. Liu, X. M. Meng, P. F. Wang, C.-S. Lee and W. J. Zhang, *Chem. Commun.*, 2015, **51**, 15574; (b) Z. N. Sun, H. L. Wang, F. Q. Liu, Y. Chen, P. K. Tam and D. Yang, *Org. Lett.*, 2009, **11**, 1887.
- 2 Y. S. Liu, D. T. Tu, H. M. Zhu, R. F. Li, W. Q. Luo and X. Y. Chen, *Adv. Mater.*, 2010, **22**, 3266.
- 3 (a) V. G. Pol, O. Palchik, A. Gedanken and I. Felner, *J. Phys. Chem. B*, 2002, **106**, 9737; (b) B. Z. Zhao, X. J. Xie, S. L. Xu, Y. Pan, B. X. Yang, S. H. Guo, T. Wei, H. Q. Su, H. B. Wang, X. Q. Chen, V. P. Dravid, L. Huang and W. Huang, *Adv. Mater.*, 2016, **28**, 6665.
- 4 K. Oka, T. Nishiguchi, H. Kanai, K. Utani and S. Imamura, *Appl. Catal. A-Gen.*, 2006, **309**, 187.
- 5 (a) Z. Z. Li, Y. M. Xin, W. L. Wu, B. H. Fu and Z. H. Zhang, *Anal. Chem.*, 2016, **88**, 7724; (b) G. M. Bremmer, L. van Haandel, E. J. M. Hensen, J. W. M. Frenken and P. J. Kooyman, *J. Phys. Chem. C*, 2016, **120**, 19204.
- 6 V. Muhr, M. Buchner, T. Hirsch, D. J. Jovanović, S. D. Dolić, M. D. Dramićanin and O. S. Wolfbeis, *Sensor Actuat. B: Chem.*, 2017, **241**, 349.
- 7 D. Casanova, C. Bouzigues, T. L. Nguyen, R. O. Ramodiharilafy, L. Bouzahir-Sima, T. Gacoin, J. P. Boilot, P. L. Tharaux and A. Alexandrou, *Nat. Nanotechnol.*, 2009, **4**, 581.
- 8 M. Abdesselem, R. Ramodiharilafy, L. Devys, T. Gacoin, A. Alexandrou and C. I. Bouzigues, *Nanoscale*, 2017, **9**, 656.
- 9 P. C. de Sousa Filho, E. Larquet, D. Dragoë, O. A. Serra and T. Gacoin, *ACS Appl. Mater. Interfaces*, 2016.
- 10 N. Duée, C. Ambard, F. Pereira, D. Portehault, B. Viana, K. Vallé, D. Autissier and C. Sanchez,

- Chem. Mater.*, 2015, **27**, 5198.
- 11 C. Ambard, N. Duée, F. Pereira, D. Portehault, C. Méthivier, C.-M. Pradier and C. Sanchez, *J. Sol-Gel Sci. Technol.*, 2016, **79**, 381.
- 12 J. Liu, L. Lu, A. Li, J. Tang, S. Wang, S. Xu and L. Wang, *Biosens. Bioelectron.*, 2015, **68**, 204.
- 13 J. Yuan, Y. Cen, X. J. Kong, S. Wu, C. L. Liu, R. Q. Yu and X. Chu, *ACS Appl. Mater. Interfaces*, 2015, **7**, 10548.
- 14 B. Liu, Z. Sun, P. J. Huang and J. Liu, *J. Am. Chem. Soc.*, 2015, **137**, 1290.
